# Supplementary material for: Global discovery of small RNAs in the fish pathogen Edwardsiella piscicida: key regulator of adversity and pathogenicity
Source: Vet Res. 2018 Dec 11;49:120. doi: 10.1186/s13567-018-0613-z (PMC6288947; doi:10.1186/s13567-018-0613-z)
Supplement: Supplementary file 3 — Additional file 3. Differentially expressed mRNA. [file 13567_2018_613_MOESM3_ESM.xlsx]

## Sheet: sRNA differential expression
Additional file 3 Differential expression anlysis of sRNAs during three stress conditions
sRNA ID	sRNA Length	Con-Expression	Ac-Expression	Con-RPKM	Ac-RPKM	Log2 Ratio(Ac/Con)	Up or Down	P-value	FDR		Dp-Expression	Dp-RPKM	Log2 Ratio(Dp/Con)	Up or Down	P-value	FDR		Pe-Expression	Pe-RPKM	Log2 Ratio(Pe/Con)	Up or Down	P-value	FDR
sR002	141	206	116	2186.67	1699.63	-0.363514	Down	0.0294502	0.0790282		106	2496.64	0.191252	Up	0.25879	0.460348		349	3582.17	0.712095	Up	1.17144e-08	5.17048e-08
sR004	128	0	23	0	336.996	18.3624	Up	1.82714e-09	2.52416e-08		/	/	/	/	/	/		26	266.866	18.0258	Up	2.33676e-08	1.00822e-07
sR009	142	1421	771	15083.8	11296.7	-0.417099	Down	6.15466e-11	9.98125e-10		615	14485.2	-0.0584164	Down	0.407256	0.600338		1165	11957.7	-0.335064	Down	3.831e-09	1.83888e-08
sR010	279	301	283	3195.09	4146.52	0.376044	Up	0.00166024	0.00746106		226	5323.03	0.736391	Up	1.08152e-08	2.22312e-07		447	4588.05	0.522024	Up	9.941e-07	3.34855e-06
sR012	170	32	13	339.678	190.476	-0.834555	Down	0.0777128	0.168528		10	235.532	-0.52824	Down	0.347348	0.549225		83	851.92	1.32655	Up	3.55942e-06	1.10227e-05
sR014	55	8	5	84.9194	73.2601	-0.213067	Down	0.84854	0.896616		12	282.639	1.73479	Up	0.0068887	0.0339843		18	184.754	1.12144	Up	0.063725	0.0933985
sR017	89	30	36	318.448	527.473	0.72804	Up	0.0399272	0.101312		20	471.065	0.564869	Up	0.163372	0.318146		83	851.92	1.41966	Up	1.0556e-06	3.52478e-06
sR020	103	1416	1134	15030.7	16615.4	0.144605	Up	0.0119456	0.038083		735	17311.6	0.203827	Up	0.0019724	0.0121631		1116	11454.7	-0.391972	Down	9.58802e-12	6.13633e-11
sR024	114	281	130	2982.79	1904.76	-0.647053	Down	1.60665e-05	0.0001362		150	3532.99	0.244224	Up	0.0924614	0.222148		476	4885.71	0.711904	Up	2.70282e-11	1.59674e-10
sR027	128	48	27	509.516	395.604	-0.36507	Down	0.303178	0.455989		32	753.704	0.564869	Up	0.0826942	0.201295		17	174.49	-1.54599	Down	5.78298e-05	0.000154213
sR028	93	39	11	413.982	161.172	-1.36097	Down	0.00360344	0.0144525		15	353.299	-0.22868	Down	0.65486	0.779094		40	410.564	-0.0119615	Down	0.968826	0.971356
sR031	90	11	12	116.764	175.824	0.590536	Up	0.317406	0.475472		2	47.1065	-1.3096	Down	0.282182	0.476746		28	287.395	1.29944	Up	0.00879366	0.0157793
sR034	98	53	36	562.591	527.473	-0.0929902	Down	0.783896	0.852458		19	447.512	-0.330161	Down	0.42489	0.611709		188	1929.65	1.77818	Up	4.09984e-18	3.27987e-17
sR035	127	15	10	159.224	146.52	-0.119957	Down	0.875254	0.909386		9	211.979	0.412866	Up	0.44694	0.633593		33	338.715	1.08902	Up	0.0131244	0.0228044
sR040	65	12	0	127.379	0	-16.9588	Down	0.00167692	0.00744631		0	0	-16.9588	Down	0.0158711	0.0611699		58	595.318	2.22453	Up	2.96338e-08	1.25048e-07
sR042	274	772	311	8194.72	4556.78	-0.846681	Down	1.47728e-19	3.93591e-18		246	5794.1	-0.500111	Down	1.23511e-06	1.75766e-05		625	6415.06	-0.353232	Down	5.04576e-06	1.53776e-05
sR043	149	2	9	21.2298	131.868	2.63493	Up	0.00866336	0.0288521		10	235.532	3.47176	Up	0.000207842	0.00202372		35	359.243	4.0808	Up	9.52574e-09	4.30339e-08
sR044	193	17	21	180.454	307.692	0.76986	Up	0.0987614	0.206955		10	235.532	0.384297	Up	0.455128	0.635462		64	656.902	1.86405	Up	2.00516e-07	7.19609e-07
sR047	87	17	13	180.454	190.476	0.0779821	Up	0.85522	0.893549		4	94.213	-0.937631	Down	0.279214	0.480508		15	153.961	-0.22906	Down	0.656616	0.704303
sR049	157	16	8	169.839	117.216	-0.534995	Down	0.41988	0.55934		5	117.766	-0.52824	Down	0.55231	0.704671		36	369.507	1.12144	Up	0.00791554	0.0143376
sR050	168	8	0	84.9194	0	-16.3738	Down	0.0148297	0.0460957		7	164.873	0.957187	Up	0.178178	0.341585		46	472.148	2.47507	Up	1.55164e-07	5.78474e-07
sR061	146	83	52	881.039	761.905	-0.209594	Down	0.421714	0.559784		32	753.704	-0.225208	Down	0.481964	0.648461		249	2555.76	1.53648	Up	2.2128e-19	1.93117e-18
sR062	180	40	45	424.597	659.341	0.63493	Up	0.0418328	0.10543		37	871.47	1.03736	Up	0.00168014	0.0117293		87	892.976	1.07253	Up	6.01176e-05	0.000159208
sR063	103	44	41	467.057	600.733	0.363126	Up	0.241358	0.405525		14	329.745	-0.502245	Down	0.2797	0.479116		458	4700.96	3.33128	Up	3.37986e-85	7.63451e-84
sR065	202	4419	4725	46907.3	69230.8	0.5616	Up	4.3018e-77	3.20914e-75		2500	58883.1	0.32804	Up	2.51092e-19	7.14646e-18		2854	29293.7	-0.679222	Down	1.11341e-87	2.67218e-86
sR068	182	85	69	902.268	1010.99	0.164139	Up	0.474498	0.614541		65	1530.96	0.762809	Up	0.001447	0.0102959		325	3335.83	1.88642	Up	1.2941e-32	1.65645e-31
sR069	134	169	276	1793.92	4043.96	1.17265	Up	2.19572e-17	5.46002e-16		137	3226.79	0.846984	Up	4.62396e-07	6.84346e-06		779	7995.73	2.15611	Up	5.52818e-90	1.5163e-88
sR070	110	43	23	456.442	336.996	-0.437698	Down	0.2489	0.408985		17	400.405	-0.18897	Down	0.699492	0.808788		112	1149.58	1.3326	Up	6.23524e-08	2.46838e-07
sR073	107	0	/	/	/	/	/	/	/		/	/	/	/	/	/		61	626.11	19.2561	Up	1.21857e-18	1.01724e-17
sR077	110	88	44	934.113	644.689	-0.534995	Down	0.0437214	0.10945		35	824.363	-0.180317	Down	0.563124	0.711112		77	790.335	-0.241132	Down	0.284432	0.345639
sR079	109	28	20	297.218	293.04	-0.0204216	Down	0.986506	0.989158		12	282.639	-0.0725606	Down	0.953382	0.971767		73	749.279	1.33398	Up	1.28559e-05	3.71177e-05
sR082	118	68	31	721.815	454.212	-0.668261	Down	0.031067	0.0821843		37	871.47	0.271822	Up	0.336918	0.539652		74	759.543	0.0735031	Up	0.763974	0.799362
sR084	380	2662	1999	28256.9	29289.4	0.0517731	Up	0.224558	0.395095		1985	46753.2	0.72646	Up	1.36079e-62	8.39151e-61		439	4505.94	-2.64871	Down	0	0
sR086	91	71	60	753.659	879.121	0.222149	Up	0.373146	0.537388		45	1059.9	0.491938	Up	0.071319	0.18074		115	1180.37	0.647256	Up	0.00267918	0.00538641
sR088	121	78	59	827.964	864.469	0.062246	Up	0.7894	0.853467		63	1483.85	0.84171	Up	0.000634348	0.00488977		39	400.3	-1.04849	Down	0.000142987	0.000356539
sR090	111	14	5	148.609	73.2601	-1.02042	Down	0.18405	0.326908		2	47.1065	-1.65752	Down	0.130031	0.284682		26	266.866	0.844597	Up	0.0756626	0.109639
sR092	142	2	12	21.2298	175.824	3.04997	Up	0.000993978	0.00494338		0	0	-14.3738	Down	0.655114	0.774416		39	400.3	4.23691	Up	7.75198e-10	4.02265e-09
sR093	112	16	56	169.839	820.513	2.27236	Up	7.29598e-10	1.04669e-08		14	329.745	0.957187	Up	0.0650828	0.178375		25	256.602	0.595369	Up	0.19979	0.252367
sR098	131	250	145	2653.73	2124.54	-0.32087	Down	0.032718	0.0847487		123	2897.05	0.126562	Up	0.41268	0.605919		463	4752.28	0.840597	Up	3.302e-14	2.34809e-13
sR099	96	62	53	658.125	776.557	0.238729	Up	0.36938	0.536104		31	730.151	0.149832	Up	0.601596	0.746948		48	492.677	-0.417721	Down	0.131858	0.177661
sR100	116	5247	7846	55696.5	114960	1.04547	Up	0	0		3372	79421.5	0.511944	Up	1.65077e-56	8.72551e-55		5855	60096.3	0.109689	Up	6.2973e-05	0.000163389
sR101	102	2740	1668	29084.9	24439.6	-0.251051	Down	1.74437e-08	2.24362e-07		1354	31891.1	0.132884	Up	0.00567446	0.0291604		3066	31469.7	0.113694	Up	0.00270934	0.00541868
sR102	133	60	32	636.895	468.864	-0.441885	Down	0.165515	0.299695		30	706.597	0.149832	Up	0.606318	0.750293		50	513.205	-0.311522	Down	0.259986	0.321012
sR103	82	263	246	2791.72	3604.4	0.368601	Up	0.00399258	0.0155128		305	7183.74	1.36358	Up	5.83574e-29	1.96293e-27		708	7266.98	1.3802	Up	1.04349e-44	1.66958e-43
sR104	124	12	6	127.379	87.9121	-0.534995	Down	0.496352	0.636218		5	117.766	-0.113203	Down	0.989158	0.989158		55	564.525	2.14791	Up	1.29938e-07	4.89178e-07
sR108	90	24	4	254.758	58.6081	-2.11996	Down	0.00223926	0.00971214		2	47.1065	-2.43513	Down	0.00733272	0.0356988		13	133.433	-0.93301	Down	0.0578656	0.0867984
sR111	319	5821	3327	61789.5	48747.3	-0.34204	Down	3.34536e-28	1.38647e-26		2961	69741.1	0.174649	Up	9.71188e-08	1.56235e-06		917	9412.18	-2.71476	Down	0	0
sR114	183	232	108	2462.66	1582.42	-0.638088	Down	0.000109707	0.000757791		62	1460.3	-0.753953	Down	0.000150442	0.00159039		331	3397.42	0.464219	Up	0.000156367	0.000382451
sR115	110	89	35	944.728	512.821	-0.881445	Down	0.00165616	0.0075335		47	1107	0.228687	Up	0.360828	0.551679		275	2822.63	1.57907	Up	4.7648e-22	4.57421e-21
sR120	68	39	16	413.982	234.432	-0.820397	Down	0.0535702	0.126466		19	447.512	0.112357	Up	0.73023	0.826254		45	461.884	0.157963	Up	0.620522	0.676933
sR123	109	23	13	244.143	190.476	-0.358117	Down	0.499618	0.638211		4	94.213	-1.37373	Down	0.0739078	0.186026		35	359.243	0.557234	Up	0.150914	0.197784
sR124	106	48	28	509.516	410.256	-0.312602	Down	0.37504	0.538038		17	400.405	-0.347668	Down	0.42802	0.609105		26	266.866	-0.93301	Down	0.0069087	0.0126935
sR125	108	34	18	360.907	263.736	-0.452533	Down	0.294194	0.446075		7	164.873	-1.13028	Down	0.0548396	0.162325		11	112.905	-1.67652	Down	0.000350986	0.000807058
sR126	124	114	62	1210.1	908.425	-0.413688	Down	0.0691436	0.155365		46	1083.45	-0.159496	Down	0.553926	0.701893		154	1580.67	0.385409	Up	0.030211	0.0479381
sR128	128	129	60	1369.32	879.121	-0.639331	Down	0.00400154	0.0153874		77	1813.6	0.405391	Up	0.0503276	0.155177		690	7082.23	2.37074	Up	1.46187e-89	3.74239e-88
sR138	89	209	95	2218.52	1391.94	-0.672498	Down	0.000121276	0.000822473		107	2520.2	0.18394	Up	0.27429	0.47424		216	2217.04	-0.00095901	Down	0.993674	0.993674
sR139	110	10	18	106.149	263.736	1.313	Up	0.0181844	0.0542624		8	188.426	0.827904	Up	0.202898	0.379153		32	328.451	1.62958	Up	0.000897946	0.00193714
sR143	113	22	17	233.528	249.084	0.0930364	Up	0.817666	0.878932		2	47.1065	-2.3096	Down	0.0133742	0.0543786		33	338.715	0.536475	Up	0.178111	0.227225
sR144	136	16	7	169.839	102.564	-0.72764	Down	0.284556	0.434997		3	70.6597	-1.26521	Down	0.179548	0.340681		19	195.018	0.19944	Up	0.690904	0.734923
sR145	149	517	603	5487.91	8835.16	0.686999	Up	1.74906e-15	3.83763e-14		527	12412.6	1.17747	Up	7.85878e-39	2.90775e-37		2754	28267.3	2.3648	Up	0	0
sR147	132	0	/	/	/	/	/	/	/		2	47.1065	15.5236	Up	0.0599674	0.170676		61	626.11	19.2561	Up	1.21857e-18	9.95596e-18
sR154	110	53	33	562.591	483.516	-0.218521	Down	0.510034	0.64489		10	235.532	-1.25616	Down	0.00768436	0.0369248		136	1395.92	1.31106	Up	3.7743e-09	1.8346e-08
sR157	94	11	6	116.764	87.9121	-0.409464	Down	0.620344	0.732241		5	117.766	0.0123283	Up	0.882756	0.941267		56	574.789	2.29944	Up	2.75642e-08	1.17607e-07
sR158	80	97	61	1029.65	893.773	-0.20417	Down	0.395382	0.53241		48	1130.56	0.134881	Up	0.568986	0.716071		70	718.487	-0.519117	Down	0.021207	0.0357171
sR159	86	105	131	1114.57	1919.41	0.784183	Up	3.05378e-05	0.000242353		28	659.491	-0.757059	Down	0.0115785	0.0481355		124	1272.75	0.191463	Up	0.318216	0.381859
sR162	123	30	8	318.448	117.216	-1.44189	Down	0.00812612	0.0283275		4	94.213	-1.75706	Down	0.0128222	0.0527136		14	143.697	-1.14802	Down	0.0117703	0.0205445
sR163	155	78	27	827.964	395.604	-1.06551	Down	0.000582604	0.00314944		26	612.384	-0.435131	Down	0.193265	0.362986		111	1139.31	0.460526	Up	0.030174	0.0480781
sR165	76	36	7	382.137	102.564	-1.89756	Down	0.000409262	0.00227843		6	141.319	-1.43513	Down	0.0170167	0.0629616		10	102.641	-1.89648	Down	6.14964e-05	0.000160644
sR166	102	45	27	477.672	395.604	-0.27196	Down	0.454412	0.598925		31	730.151	0.612175	Up	0.0664914	0.180896		31	318.187	-0.586144	Down	0.0808654	0.114584
sR168	90	1032	414	10954.6	6065.93	-0.852735	Down	6.54342e-26	2.4407e-24		255	6006.08	-0.867042	Down	1.14355e-19	3.52595e-18		801	8221.54	-0.414056	Down	9.36636e-10	4.73248e-09
sR169	104	20	13	212.298	190.476	-0.156483	Down	0.792574	0.854422		9	211.979	-0.00217127	Down	0.923554	0.962577		2	20.5282	-3.37042	Down	4.76926e-05	0.000130814
sR171	120	30	10	318.448	146.52	-1.11996	Down	0.0294744	0.0785282		10	235.532	-0.435131	Down	0.456256	0.627564		84	862.184	1.43694	Up	7.21614e-07	2.47411e-06
sR172	126	45	39	477.672	571.429	0.258554	Up	0.403964	0.542009		34	800.81	0.745442	Up	0.0227302	0.0808671		116	1190.64	1.31764	Up	4.73704e-08	1.93513e-07
sR173	126	18	11	191.069	161.172	-0.245488	Down	0.690096	0.789588		14	329.745	0.787262	Up	0.116336	0.259303		36	369.507	0.951513	Up	0.0202444	0.034246
sR174	102	29	12	307.833	175.824	-0.808013	Down	0.103572	0.213439		9	211.979	-0.538224	Down	0.367568	0.559671		58	595.318	0.951513	Up	0.00306704	0.00607084
sR176	205	24196	16981	256839	248806	-0.0458419	Down	0.0014941	0.00688022		6566	154651	-0.73185	Down	0	0		9844	101040	-1.34594	Down	0	0
sR177	204	99	9	1050.88	131.868	-2.99443	Down	8.54196e-15	1.77008e-13		43	1012.79	-0.05326	Down	0.876052	0.939534		55	564.525	-0.896484	Down	0.000166647	0.000402468
sR179	122	11	16	116.764	234.432	1.00557	Up	0.0714166	0.158562		10	235.532	1.01233	Up	0.098699	0.234094		12	123.169	0.0770435	Up	0.904296	0.925999
sR183	69	187	115	1984.99	1684.98	-0.236399	Down	0.168875	0.304302		96	2261.11	0.1879	Up	0.289298	0.482163		176	1806.48	-0.13595	Down	0.36957	0.430045
sR185	152	6	6	63.6895	87.9121	0.465005	Up	0.554464	0.675866		0	0	-15.9588	Down	0.147922	0.309216		102	1046.94	4.03898	Up	3.33304e-23	3.65682e-22
sR188	78	40	11	424.597	161.172	-1.39749	Down	0.00261934	0.01123		7	164.873	-1.36474	Down	0.0148429	0.0590522		13	133.433	-1.66998	Down	0.00010714	0.0002689
sR191	183	964	897	10232.8	13142.9	0.36108	Up	7.31658e-08	8.52839e-07		834	19643.4	0.940846	Up	5.60444e-42	2.30405e-40		923	9473.76	-0.11119	Down	0.0941642	0.130069
sR193	197	1685	1527	17886.1	22373.6	0.322957	Up	2.6106e-10	3.89502e-09		1479	34835.2	0.961705	Up	9.76652e-76	9.03403e-74		1150	11803.7	-0.599602	Down	5.41174e-28	6.2973e-27
sR194	85	14	13	148.609	190.476	0.35809	Up	0.503062	0.638239		8	188.426	0.342477	Up	0.53049	0.69851		62	636.374	2.09835	Up	3.21586e-08	1.34227e-07
sR198	92	1437	772	15253.6	11311.4	-0.431382	Down	1.16581e-11	1.97658e-10		458	10787.4	-0.499809	Down	3.4401e-11	8.48558e-10		2032	20856.6	0.451353	Up	6.34842e-20	5.66929e-19
sR200	201	40	20	424.597	293.04	-0.534995	Down	0.181253	0.323481		18	423.958	-0.00217127	Down	0.947542	0.976575		73	749.279	0.819409	Up	0.00336574	0.00643007
sR202	110	928	369	9850.65	5406.59	-0.865499	Down	5.16464e-24	1.75128e-22		439	10339.9	0.069928	Up	0.39609	0.590941		415	4259.6	-1.2095	Down	1.95673e-49	3.41538e-48
sR205	166	176	250	1868.23	3663	0.971358	Up	4.71898e-12	8.38181e-11		138	3250.35	0.798925	Up	1.52066e-06	2.08387e-05		565	5799.21	1.63419	Up	9.48524e-46	1.58362e-44
sR209	130	152	166	1613.47	2432.23	0.592117	Up	0.000252764	0.00149652		88	2072.69	0.361336	Up	0.0605238	0.170945		197	2022.03	0.325637	Up	0.03626	0.056601
sR210	117	6	2	63.6895	29.304	-1.11996	Down	0.391726	0.535215		6	141.319	1.14983	Up	0.14809	0.304406		57	585.053	3.19944	Up	2.15192e-11	1.29115e-10
sR212	161	85	82	902.268	1201.47	0.413166	Up	0.0635148	0.143582		59	1389.64	0.623084	Up	0.0110581	0.0464945		182	1868.07	1.04992	Up	1.07056e-08	4.78019e-08
sR214	187	3158	1045	33521.9	15311.4	-1.1305	Down	2.3157e-119	2.87919e-117		586	13802.2	-1.28021	Down	2.39232e-104	2.95053e-102		6633	68081.7	1.02216	Up	2.65306e-251	1.13197e-249
sR215	140	10	6	106.149	87.9121	-0.27196	Down	0.762888	0.841885		2	47.1065	-1.1721	Down	0.360298	0.553155		28	287.395	1.43694	Up	0.00469132	0.00883072
sR216	76	6	16	63.6895	234.432	1.88004	Up	0.00393218	0.015439		6	141.319	1.14983	Up	0.14809	0.302725		14	143.697	1.17391	Up	0.092301	0.127955
sR223	143	407	231	4320.27	3384.62	-0.352131	Down	0.00286758	0.0120181		281	6618.46	0.615373	Up	5.7835e-08	1.019e-06		2120	21759.9	2.33248	Up	4.01722e-266	1.92827e-264
sR225	131	24	2	254.758	29.304	-3.11996	Down	0.000166969	0.00107378		8	188.426	-0.435131	Down	0.51946	0.691368		44	451.62	0.825982	Up	0.0224284	0.0374457
sR226	107	71	22	753.659	322.344	-1.22531	Down	0.00024943	0.0015006		38	895.023	0.248012	Up	0.371244	0.562952		98	1005.88	0.416475	Up	0.0635592	0.0935124
sR228	105	85	27	902.268	395.604	-1.1895	Down	8.69758e-05	0.000623884		49	1154.11	0.355151	Up	0.162703	0.318519		124	1272.75	0.496318	Up	0.0140897	0.024262
sR230	115	240	384	2547.58	5626.37	1.14308	Up	1.10874e-22	3.44633e-21		245	5770.54	1.17958	Up	5.24368e-19	1.38583e-17		1278	13117.5	2.36429	Up	8.2347e-164	2.87466e-162
sR231	70	52	6	551.976	87.9121	-2.65047	Down	1.66788e-07	1.82976e-06		4	94.213	-2.55061	Down	2.38564e-05	0.000294229		14	143.697	-1.94157	Down	9.02196e-07	3.06587e-06
sR233	133	944	334	10020.5	4893.77	-1.03393	Down	3.40224e-32	1.58629e-30		413	9727.49	-0.0428132	Down	0.624908	0.755608		197	2022.03	-2.30908	Down	4.46334e-123	1.42827e-121
sR234	116	109	137	1157.03	2007.33	0.794853	Up	1.6036e-05	0.000139103		78	1837.15	0.66705	Up	0.00197075	0.0123589		491	5039.67	2.12291	Up	2.85224e-56	5.4763e-55
sR236	174	83	142	881.039	2080.59	1.23971	Up	2.00776e-10	3.12039e-09		52	1224.77	0.475232	Up	0.0610324	0.171076		208	2134.93	1.27691	Up	8.67118e-13	5.94595e-12
sR237	104	141	53	1496.7	776.557	-0.946626	Down	2.4362e-05	0.000197544		33	777.257	-0.945325	Down	0.000381808	0.00344558		118	1211.16	-0.305396	Down	0.089518	0.125915
sR240	145	249	160	2643.12	2344.32	-0.173069	Down	0.239446	0.404133		142	3344.56	0.339577	Up	0.0253556	0.0868664		655	6722.98	1.34686	Up	4.96268e-40	7.3295e-39
sR241	141	65	49	689.97	717.949	0.0573472	Up	0.81892	0.87775		42	989.236	0.519781	Up	0.0667146	0.180178		383	3931.15	2.51035	Up	7.69128e-54	1.40641e-52
sR243	97	12	11	127.379	161.172	0.339474	Up	0.553764	0.679454		9	211.979	0.734794	Up	0.223378	0.407142		18	184.754	0.536475	Up	0.325126	0.385335
sR248	149	26	9	275.988	131.868	-1.06551	Down	0.0527328	0.125282		10	235.532	-0.22868	Down	0.739488	0.824128		56	574.789	1.05843	Up	0.00149658	0.00312329
sR259	58	11	7	116.764	102.564	-0.187071	Down	0.832898	0.887631		2	47.1065	-1.3096	Down	0.282182	0.472431		24	246.338	1.07704	Up	0.0370118	0.0575406
sR269	130	13	10	137.994	146.52	0.0864936	Up	0.854918	0.895743		19	447.512	1.69732	Up	0.000871228	0.00632067		59	605.582	2.13372	Up	5.07458e-08	2.0512e-07
sR272	194	6	6	63.6895	87.9121	0.465005	Up	0.554464	0.678082		10	235.532	1.8868	Up	0.00877412	0.0395905		24	246.338	1.95151	Up	0.00121376	0.0025609
sR274	131	2554	1541	27110.5	22578.8	-0.263886	Down	1.15917e-08	1.54418e-07		910	21433.5	-0.338988	Down	6.20548e-10	1.3506e-08		3587	36817.3	0.441532	Up	1.20409e-32	1.59439e-31
sR276	131	27	11	286.603	161.172	-0.830451	Down	0.108725	0.222826		7	164.873	-0.797701	Down	0.21214	0.394431		72	739.015	1.36655	Up	1.02072e-05	2.96937e-05
sR281	77	111	40	1178.26	586.081	-1.00748	Down	8.32566e-05	0.000608916		24	565.278	-1.05962	Down	0.000572136	0.00450405		556	5706.84	2.27604	Up	4.19322e-69	8.47472e-68
sR285	108	84	63	891.653	923.077	0.0499677	Up	0.822344	0.878895		53	1248.32	0.485435	Up	0.05395	0.16098		202	2073.35	1.21741	Up	1.1426e-11	7.19276e-11
sR286	158	60	19	636.895	278.388	-1.19396	Down	0.000996848	0.00489243		23	541.725	-0.233497	Down	0.546996	0.705186		39	400.3	-0.669976	Down	0.0229698	0.0381836
sR290	81	31	33	329.063	483.516	0.555203	Up	0.121212	0.245718		13	306.192	-0.103925	Down	0.893252	0.949722		22	225.81	-0.543252	Down	0.177191	0.226804
sR297	152	4	11	42.4597	161.172	1.92444	Up	0.0156881	0.0479645		5	117.766	1.47176	Up	0.111314	0.249613		37	379.772	3.16097	Up	9.98718e-08	3.83508e-07
sR300	112	0	/	/	/	/	/	/	/		5	117.766	16.8456	Up	0.00179805	0.01188		41	420.828	18.6829	Up	9.15618e-13	6.16837e-12
sR301	119	124	48	1316.25	703.297	-0.904229	Down	0.000141287	0.00092456		46	1083.45	-0.280803	Down	0.272628	0.473579		127	1303.54	-0.013999	Down	0.937756	0.94514
sR302	113	39	13	413.982	190.476	-1.11996	Down	0.0123961	0.0391843		19	447.512	0.112357	Up	0.73023	0.823735		92	944.297	1.18967	Up	7.28234e-06	2.15109e-05
sR304	81	0	2	0	29.304	14.8388	Up	0.148294	0.279361		2	47.1065	15.5236	Up	0.0599674	0.173343		23	236.074	17.8489	Up	1.77825e-07	6.56584e-07
sR305	110	5	2	53.0746	29.304	-0.856923	Down	0.549614	0.685639		2	47.1065	-0.172096	Down	0.950496	0.976899		40	410.564	2.95151	Up	8.05074e-08	3.12271e-07
sR314	103	10	4	106.149	58.6081	-0.856923	Down	0.347364	0.514154		4	94.213	-0.172096	Down	0.958148	0.973942		36	369.507	1.79951	Up	0.000155722	0.000383316
sR315	211	1226	1880	13013.9	27545.8	1.08178	Up	1.74538e-95	1.62757e-93		1141	26874.2	1.04617	Up	1.2858e-67	9.51493e-66		1037	10643.9	-0.29003	Down	1.80983e-06	5.84013e-06
sR318	98	10035	6897	106521	101055	-0.0759945	Down	0.00074817	0.00387594		4515	106343	-0.0024109	Down	0.929292	0.965837		3790	38900.9	-1.45326	Down	0	0
sR325	85	18	6	191.069	87.9121	-1.11996	Down	0.0987914	0.205861		3	70.6597	-1.43513	Down	0.110889	0.250176		16	164.226	-0.218412	Down	0.661804	0.707891
sR328	130	21	10	222.913	146.52	-0.605384	Down	0.291138	0.443243		4	94.213	-1.24249	Down	0.117567	0.260478		31	318.187	0.513392	Up	0.210214	0.264663
sR331	111	11	4	116.764	58.6081	-0.994426	Down	0.258286	0.411712		5	117.766	0.0123283	Up	0.882756	0.943988		34	348.979	1.57954	Up	0.000807166	0.00175114
sR335	119	203	110	2154.83	1611.72	-0.418971	Down	0.0136079	0.0426532		123	2897.05	0.42701	Up	0.00987974	0.0425059		577	5922.38	1.4586	Up	8.64876e-40	1.23005e-38
sR341	122	6	5	63.6895	73.2601	0.201971	Up	0.77849	0.849055		10	235.532	1.8868	Up	0.00877412	0.0391135		33	338.715	2.41094	Up	1.34018e-05	3.81207e-05
sR344	84	28	11	297.218	161.172	-0.882918	Down	0.0847728	0.181726		6	141.319	-1.07256	Down	0.0997392	0.233566		123	1262.48	2.08667	Up	6.37192e-15	4.61664e-14
sR346	121	23	20	244.143	293.04	0.263371	Up	0.53535	0.674613		7	164.873	-0.566375	Down	0.413186	0.601885		101	1036.67	2.08616	Up	1.70839e-12	1.13107e-11
sR349	109	44	72	467.057	1054.95	1.1755	Up	1.42687e-05	0.000126719		36	847.917	0.860325	Up	0.00807994	0.0369084		90	923.769	0.983934	Up	0.000142988	0.00035424
sR355	106	33	63	350.292	923.077	1.39789	Up	3.31812e-06	3.17348e-05		41	965.683	1.46299	Up	1.35651e-05	0.000173072		123	1262.48	1.84963	Up	6.06462e-13	4.23421e-12
sR356	236	769	645	8162.88	9450.55	0.211321	Up	0.00612718	0.0219754		417	9821.7	0.266896	Up	0.00247346	0.014761		1427	14646.9	0.843442	Up	9.71584e-41	1.49235e-39
sR358	87	49	22	520.131	322.344	-0.690273	Down	0.0612512	0.141029		19	447.512	-0.216951	Down	0.623618	0.75652		121	1241.96	1.25567	Up	7.71506e-08	3.02304e-07
sR362	93	193	47	2048.68	688.645	-1.57286	Down	2.07074e-13	3.86193e-12		57	1342.53	-0.609735	Down	0.00419264	0.0238658		271	2781.57	0.441205	Up	0.0011006	0.00233497
sR365	109	1441	487	15296.1	7135.53	-1.10007	Down	3.67768e-53	1.95968e-51		282	6642.01	-1.20347	Down	2.48492e-44	1.14928e-42		4893	50222.2	1.71516	Up	0	0
sR368	87	65	22	689.97	322.344	-1.09793	Down	0.00133298	0.00629367		10	235.532	-1.55061	Down	0.000506416	0.0042585		44	451.62	-0.611424	Down	0.0290332	0.0466475
sR370	70	0	2	0	29.304	14.8388	Up	0.148294	0.276568		/	/	/	/	/	/		52	533.733	19.0258	Up	5.37018e-16	4.04343e-15
sR371	111	20	0	212.298	0	-17.6957	Down	2.14422e-05	0.000177732		0	0	-17.6957	Down	0.00080917	0.00598786		37	379.772	0.839038	Up	0.034192	0.0535907
sR372	84	22	34	233.528	498.168	1.09304	Up	0.00493334	0.0184014		40	942.13	2.01233	Up	5.84696e-08	9.83352e-07		334	3428.21	3.87579	Up	8.8547e-71	1.889e-69
sR373	111	4	2	42.4597	29.304	-0.534995	Down	0.75382	0.83683		0	0	-15.3738	Down	0.311298	0.500784		49	502.941	3.56622	Up	8.19842e-11	4.6297e-10
sR375	76	41	12	435.212	175.824	-1.30758	Down	0.00374928	0.0148775		14	329.745	-0.400365	Down	0.406074	0.60099		75	769.807	0.822779	Up	0.00285406	0.00567854
sR378	137	19	10	201.684	146.52	-0.460994	Down	0.439488	0.581309		10	235.532	0.223832	Up	0.628206	0.754663		8	82.1128	-1.29641	Down	0.0286014	0.0461468
sR380	148	409	139	4341.5	2036.63	-1.09201	Down	4.86794e-16	1.13484e-14		124	2920.6	-0.571929	Down	7.22116e-05	0.000834947		690	7082.23	0.706008	Up	1.6544e-15	1.22171e-14
sR382	116	23	3	244.143	43.956	-2.47359	Down	0.00107379	0.00520162		7	164.873	-0.566375	Down	0.413186	0.604264		43	441.356	0.854215	Up	0.0202328	0.0343779
